# Supplementary material
Source: publisher figshare collection journal article supplement (https://tandf.figshare.com/ndownloader/files/22430811)
Supplement: Supplementary file 1 [file 22430811]

**Glycolipids from Natural Sources: Dry Liquid Crystal Properties, Hydrogen Bonding and Molecular Mobility of Palm Kernel Oil Mannosides**

**Electronic Supplementary Information, ESI.**

Alfonso Martinez-Felipe1, Thamil Selvi Velayutham2,3, Nurul Fadhilah Kamalul Aripin3,4*, Marina Yusoff3,4, Emma Farquharson1, Rauzah Hashim3

1Chemical and Materials Engineering Group, School of Engineering, University of Aberdeen. King’s College, Aberdeen AB24 3UE, UK.

2Low Dimensional Material Research Center, Department of Physics, Faculty of Science, University of Malaya, 50603 Kuala Lumpur, Malaysia.

3Fundamental and Frontier Sciences in Nanostructure Self-Assembly Center, Department of Chemistry, Faculty of Science, University of Malaya, 50603 Kuala Lumpur, Malaysia.

4Faculty of Chemical Engineering, Universiti Teknologi MARA, 40450 Shah Alam, Malaysia.

*Corresponding author

Email address: [fadhilah9413@salam.uitm.edu.my](mailto:fadhilah9413@salam.uitm.edu.my)

Phone number: +603-5543 8415

**Contents**

|  | **Page** |
| --- | --- |
| 1. Details on the synthetic procedure……………………………... | 3 |
| 2. Nuclear Magnetic Resonance, NMR………..…………………. | 5 |
| 3. Gas chromatography-mass spectroscopy, GC-MS….................. | 7 |
| 4. Polarised Optical Microscope images, POM .....……………… | 8 |
| 5. POM images for the samples in ITO cell……………………… | 9 |
| 6. Static permittivity for planar and homeotropic alignments……. | 10 |

**1. Details on the synthetic procedure**

The synthetic procedure to produce the mannosides consists of three steps.

*Peracetylation*:

D(+)-mannose monohydrate (111 mmol) was stirred with 100 ml of acetic anhydride in a round bottom flask immersed in an ice bath for 15 minutes before a few drops of concentrated sulfuric acid were added. The ice bath was removed after 25 minutes and the solution was stirred for 45 minutes at room temperature. Several ice water – ethyl acetate extractions were performed to recover the mannose pentaacetate, once the reaction was completed. Saturated sodium hydrogen carbonate solution was added to neutralise the organic solution and anhydrous magnesium sulphate was used to remove remaining water from the solution prior to ethyl acetate evaporation. The product was confirmed by 1H-NMR.

*Glycosylation:*

15 mmol of mannose pentaacetate and 20 mmol of alcohol (dodecanol, oleyl alcohol or reduced PKO) were dissolved in 60 ml dichloromethane in a round bottom flask. BF3 (18 mmol) was injected into the solution and the solution was stirred for 24 hours. Glycosylation reaction was stopped by adding saturated sodium hydrogen bicarbonate solution. Following the liquid-liquid extractions, the organic layer was collected, and the solvent was then removed by evaporation. The second extraction was performed using hexane and acetonitrile to completely remove the excess alcohol. In the cases of αManC12 and αManC18:1, additional purification using column chromatography was carried out.

*Deacetylation*:

A methanolic solution of acetylated mannoside was stirred for at least 12 hours with a catalytic amount of sodium methoxide. Methanol was evaporated after neutralisation with diluted sulfuric acid. The final product was purified by butanol-water extractions which were then allowed to dry in vacuum at 50°C for 48 hours, prior to the 1H-NMR assessment.

**2. NMR spectra**

**Figure ESI1**. 1H-NMR spectra of αManPKO in methanol-d4.

**Figure ESI2**. 1H-NMR spectra of αManC12 in methanol-d4.

**Figure ESI3**. 1H-NMR spectra of αManC18:1 in methanol-d4.

**3. Gas chromatography-mass spectroscopy, GC-MS.**

**Figure ESI4**. GC-MS chromatogram of PKO after reduction showing composition of fatty alcohols.

The PKO sample was measured using a 30 m x 0.250 mm ID x 0.25 μm column, programmed from 75°C to 300°C at 10°C/min, and then the final temperature was held for five minutes. The temperatures of the injector and detector were set at 280°C and 360°C, respectively. Helium was used as carrier gas.

**Table ESI1** Palm kernel oil fatty alcohol composition

| Peak, min | Fatty alcohol | Composition, % |
| --- | --- | --- |
| 4.28 | C8 | 4.6 |
| 6.35 | C10 | 4.5 |
| 8.47 | C12 | 49.6 |
| 10.38 | C14 | 16.1 |
| 12.18 | C16 | 8.4 |
| 13.87 | C18 | 2.5 |
| 14.06 | C18:1 | 7.6 |

**4. Polarised Optical Microscopy images, POM.**


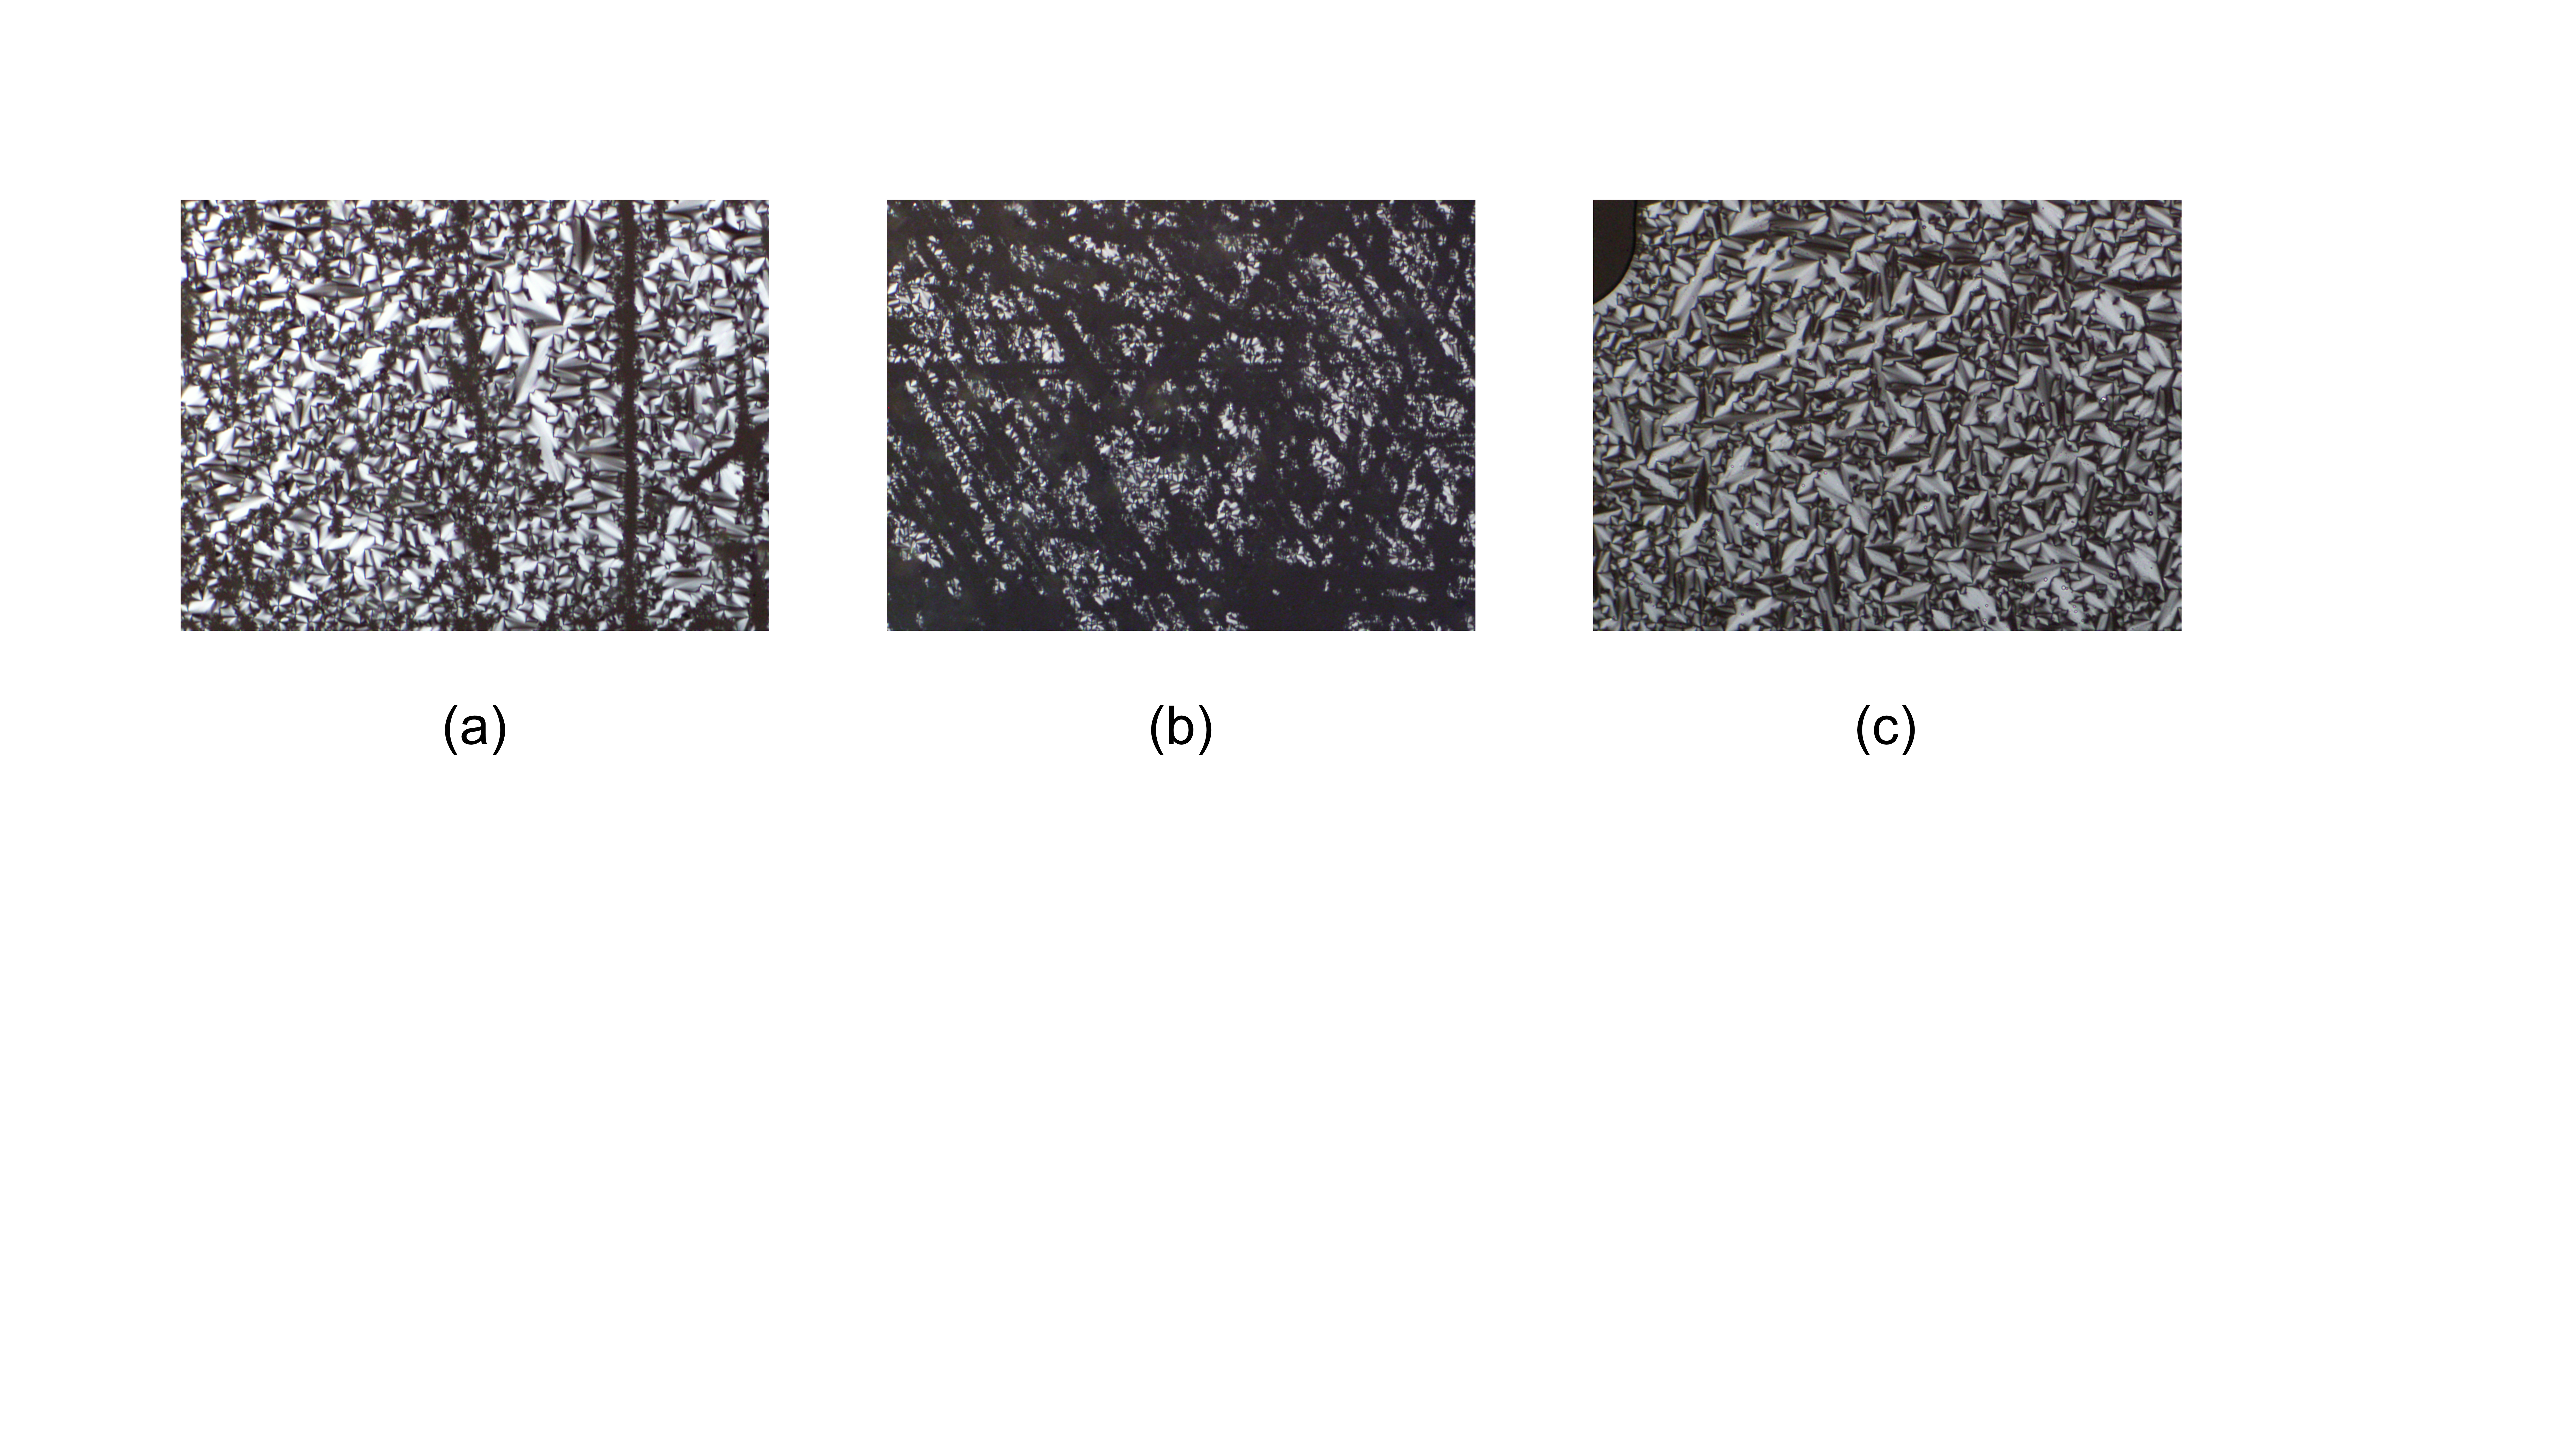


**Figure ESI4.** POM images obtained for **(a)** αManC12, T=110, **(b)** αManPKO, T=80 and **(c)** αManC18:1, T=124.

**5. POM images for the samples in ITO cell**

*Planar alignment*

| **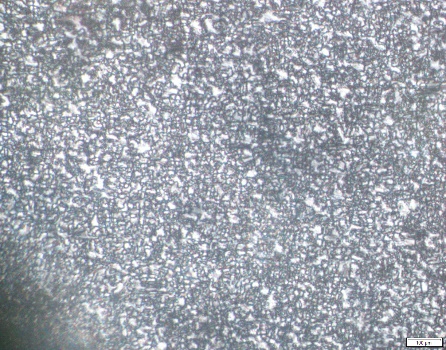** | *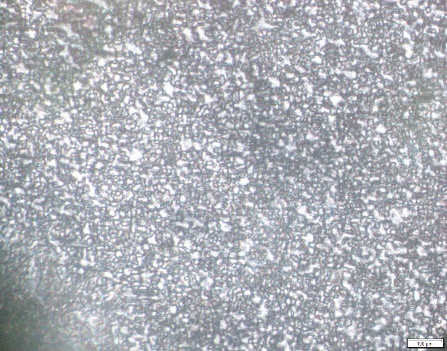* | *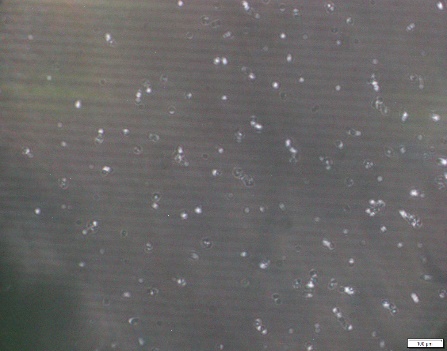* |
| --- | --- | --- |
| *29°C* | *125°C* | *148°C* |

*Homeotropic alignment*

| *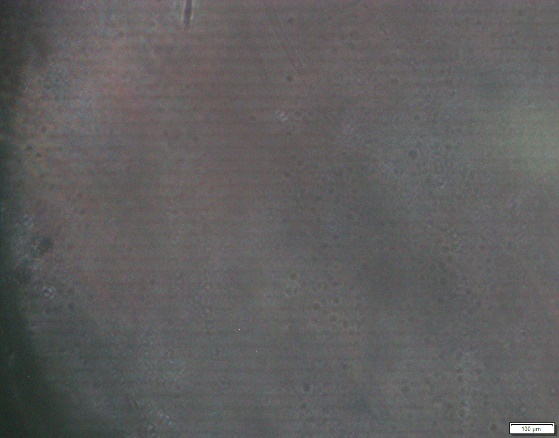* | *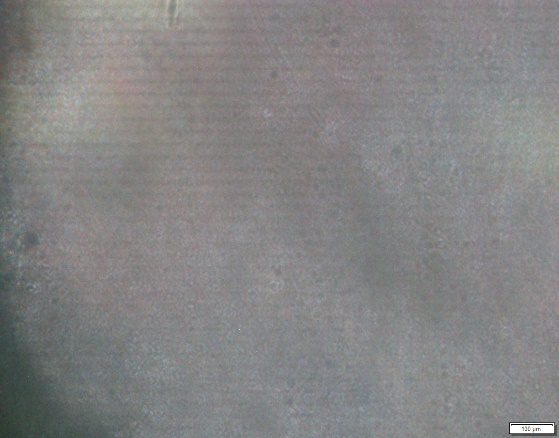* | *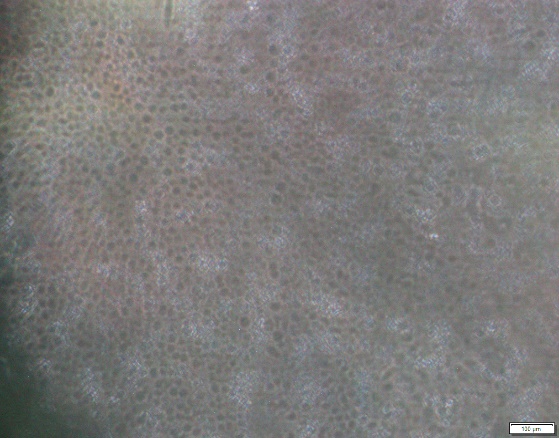* |
| --- | --- | --- |
| *29°C* | *125°C* | *148°C* |
| *Heating* | | |

**Figure ESI5.** POM images obtained for ManPKO samples in the ITO cell with surface-treated substrates for planar and homeotropic alignment on heating.

**6. Static permittivity for planar and homeotropic alignments**





**Figure ESI6.** Static permittivity *versus* temperature for planar and homeotropic alignments of ManPKO.
